# Supplementary material
Source: HighWire-hosted journal article supplement (https://econgeol.geoscienceworld.org/content/suppl/2016/05/24/111.5.1187)
Supplement: AppendixFigure3.pdf [file AppendixFigure3.pdf]

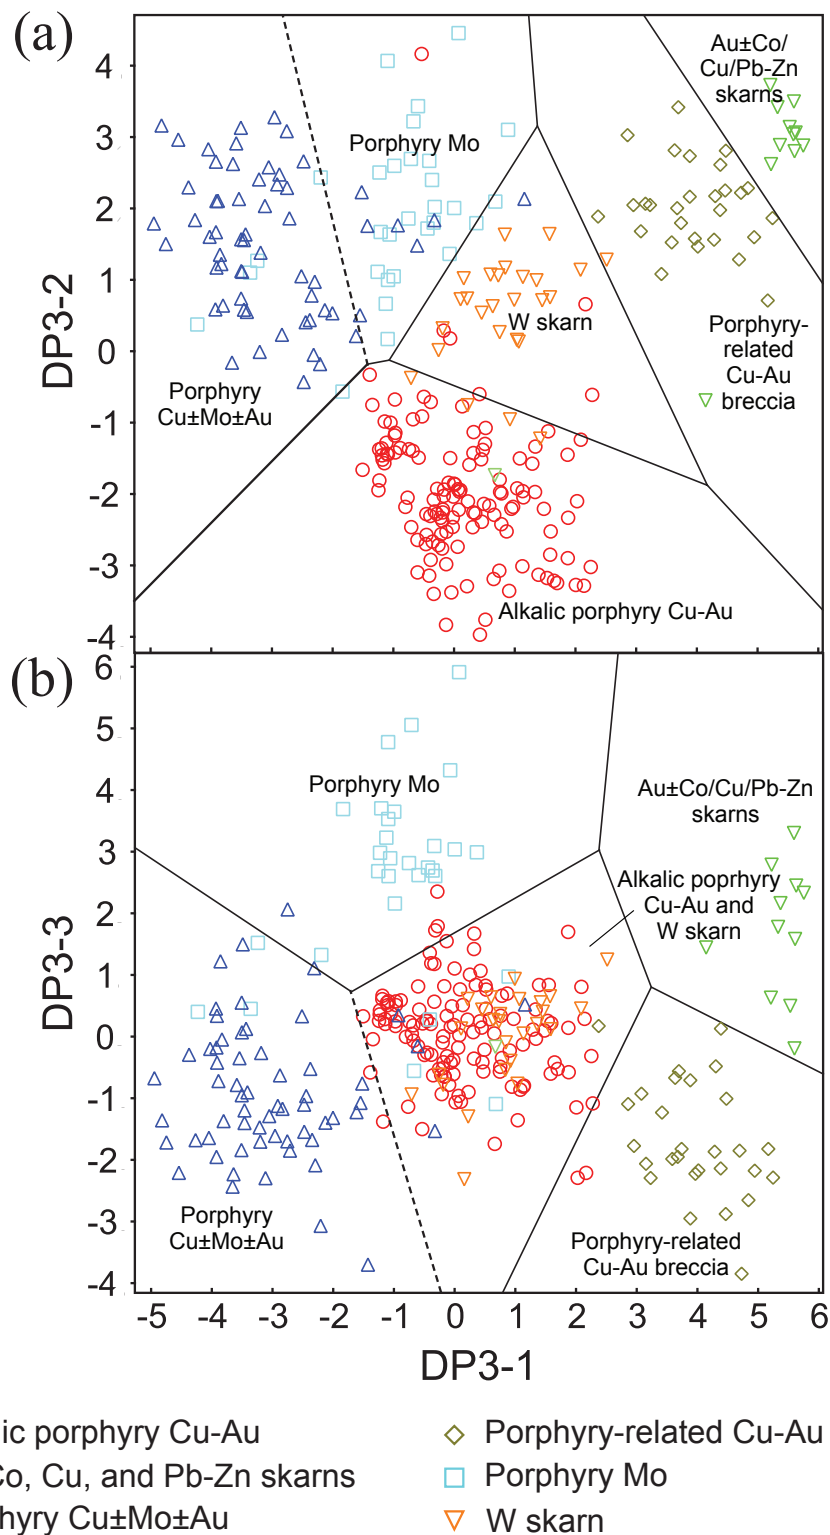

Appendix Fig. 3. Discrimination diagrams with boundaries for apatites from different porphyry and skarn deposits (discrimination step IIIa; Table 5; App. Table 5): a) The first discriminant function (DP3-1) vs. the second discriminant function (DP3-2). b) The first discriminant function (DP3-1) vs. the third discriminant function (DP3-3).  $DP3-1 = 0.8718 \cdot \log Mg - 4.156 \cdot \log Mn - 3.065 \cdot \log Sr + 6.341 \cdot \log Y - 1.704 \cdot \log Ce - 1.806 \cdot \log Eu - 7.320 \cdot \log Yb - 0.2802 \cdot \log Pb + 0.6948 \cdot \log Th + 1.698 \cdot \log U + 21.07$ ;  $DP3-2 = -1.473 \cdot \log Mg + 2.550 \cdot \log Mn - 2.981 \cdot \log Sr - 5.398 \cdot \log Y + 0.5600 \cdot \log Ce - 2.898 \cdot \log Eu + 3.780 \cdot \log Yb + 2.108 \cdot \log Pb - 0.4108 \cdot \log Th - 0.1375 \cdot \log U + 8.534$ ;  $DP3-3 = 0.1617 \cdot \log Mg - 1.173 \cdot \log Mn - 4.364 \cdot \log Sr + 2.634 \cdot \log Y + 0.8452 \cdot \log Ce + 3.378 \cdot \log Eu - 3.184 \cdot \log Yb + 1.619 \cdot \log Pb + 1.956 \cdot \log Th - 0.6212 \cdot \log U + 4.471$ . Variables are log<sub>10</sub>-equivalents of element concentrations in ppm for all elements, except for Mg, which is in wt %.
